# Supplementary material for: Population Dynamics of Intestinal Enterococcus Modulate Galleria mellonella Metamorphosis
Source: PubMed Central journal article supplement (PMC10434003; doi:10.1128/spectrum.02780-22), 2023-06-26

1 **SUPPLEMENTAL MATERIALS**

2 **Population dynamics of intestinal *Enterococcus* modulate *Galleria mellonella***  
3 **metamorphosis**

4  
5 **Hyun Gi Kong<sup>1,3</sup>, Jin-Soo Son<sup>1</sup>, Joon-Hui Chung<sup>1</sup>, Soohyun Lee<sup>1</sup>, Jun-Seob Kim<sup>1,2\*</sup>, and**  
6 **Choong-Min Ryu<sup>1\*</sup>**

7  
8 <sup>1</sup>Infection Disease Research Center, KRIBB, Daejeon 34141, South Korea

9 <sup>2</sup>Department of Nano-Bioengineering, Incheon National University, Incheon 22012, South  
10 Korea.

11 <sup>3</sup>Department of Plant Medicine, Chungbuk National University, Cheongju, 28644, South Korea.

12  
13  
14 **\*Co-correspondence**

15 **\*For correspondence. E-mail** junkim@inu.ac.kr; cmryu@kribb.re.kr

16  
17 **Running title: Gut bacteria modulate insect metamorphosis**

18 **Keywords:** Microbiota alteration, Insect metamorphosis, Host–microbe interactions

19

## SUPPLEMENTARY TABLES

20 **Table S1.** Primer Sequence details

21

| <b>Primer name</b>  | <b>Sequence 5'-3'</b> | <b>Reference</b>               |
|---------------------|-----------------------|--------------------------------|
| Gallerimycin F      | GAAGTCTACAGAATCACACGA | Lange <i>et al.</i> (2018)     |
| Gallerimycin R      | ATCGAAGACATTGACATCCA  |                                |
| Apolipophorin III F | AGACTTGACGCCATCAAGA   | Lange <i>et al.</i> (2018)     |
| Apolipophorin III R | TGCATGCTGTTTGTCACTGC  |                                |
| Gloverin F          | GTGTTGAGCCCGTATGGGAA  | Lange <i>et al.</i> (2018)     |
| Gloverin R          | CCGTGCATCTGCTTGCTAAC  |                                |
| Cecropin-D F        | CTGTTCGTGTTTCGCTTGTGT | Lange <i>et al.</i> (2018)     |
| Cecropin-D R        | GTAGCTGCTTCGCCTACCAC  |                                |
| IMPI-F              | TAGTAAGCAGTAGCATAGTCC | Dubovskiy <i>et al.</i> (2016) |
| IMPI-R              | GCCATCTTCACAGTAGCA    |                                |
| $\beta$ -Actin f    | CCCTGTGCTGCTCACCGA    | Lange <i>et al.</i> (2018)     |
| $\beta$ -Actin r    | ACAGTGTGGGTGACCCCGTC  |                                |

22

## SUPPLEMENTARY FIGURES LEGENDS

23  
24  
25  
26  
27  
28  
29  
30  
31  
32  
33  
34  
35  
36  
37  
38  
39  
40  
41  
42  
43  
44

**Fig S1. Heatmap of gene expression of *G. mellonella* according to metamorphosis.** Normalized counts obtained with DESeq transformed to hellinger distance were used to generate heatmaps showing overexpressed (red) and underexpressed (blue) genes for two developmental conditions (larva and pupae).

**Fig S2. Sparse Canonical Correlation analysis.** Sparse canonical correlation analysis was performed to analyze the correlation between microbiome data and RNAseq expression in the larva and pupae stages of *Galleria mellonella*. The database was performed with taxon and gene lists that differ by more than 2-fold change, and analyzed using the iSFun package of the R program. Gene ontology analysis was performed on the genetic data from the obtained data using Panther, and it was created as a heatmap through R program.

**Fig S3. Hemolymph protein profile analysis.** In-gel chymotryptic digestion for each protein segment < 25 kDa on electrophoresis was analyzed with LC-ESI-Q-TOF-MS for protein profile analysis. The fasta sequence DB of “Ditrysia and antimicrobial” (including 20 *Galleria* antimicrobial protein sequences) and the fasta sequence DB of “Lepidoptera” (including 17,496 *Galleria* sequence DB) are used as databases.

**Fig S4. Confirmation of the presence of *Enterococcus* spp in the intestine after vancomycin treatment.** *E. innesii* ( $Eg^{refR}$ ) and *E. mundtii* ( $Em^{refR}$ ) marked with rifampicin antibiotics were used to confirm the removal of Gram-positive bacteria from the intestine after vancomycin treatment. After feeding each bacteria, the reduction of bacteria by antibiotic treatment was tested by culturing in rifampicin-TSA.

## References

- 45  
46 Dubovskiy IM., Grizanova EV., Whitten MMA., Mukherjee K., Greig C., Alikina T., et al. (2016).  
47 Immuno-physiological adaptations confer wax moth *Galleria mellonella* resistance to  
48 *Bacillus thuringiensis*. *Virulence* 7, 860–870.
- 49 Lange A., Schäfer A., Bender A., Steimle A., Beier S., Parusel R., et al. (2018). *Galleria mellonella*:  
50 A novel invertebrate model to distinguish intestinal symbionts from pathobionts. *Front.*  
51 *Immunol.* 9, 2114.
- 52

# Supplementary Figure 1

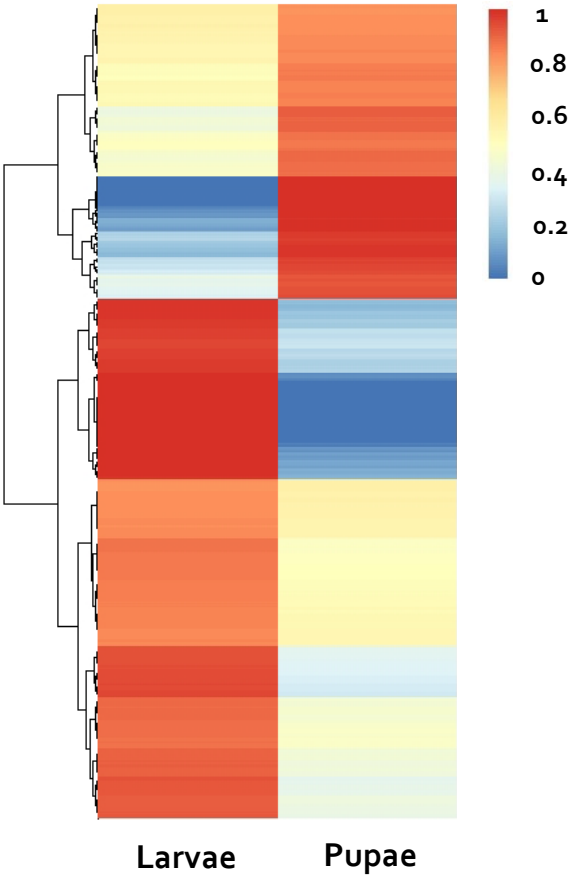

# Supplementary Figure 2

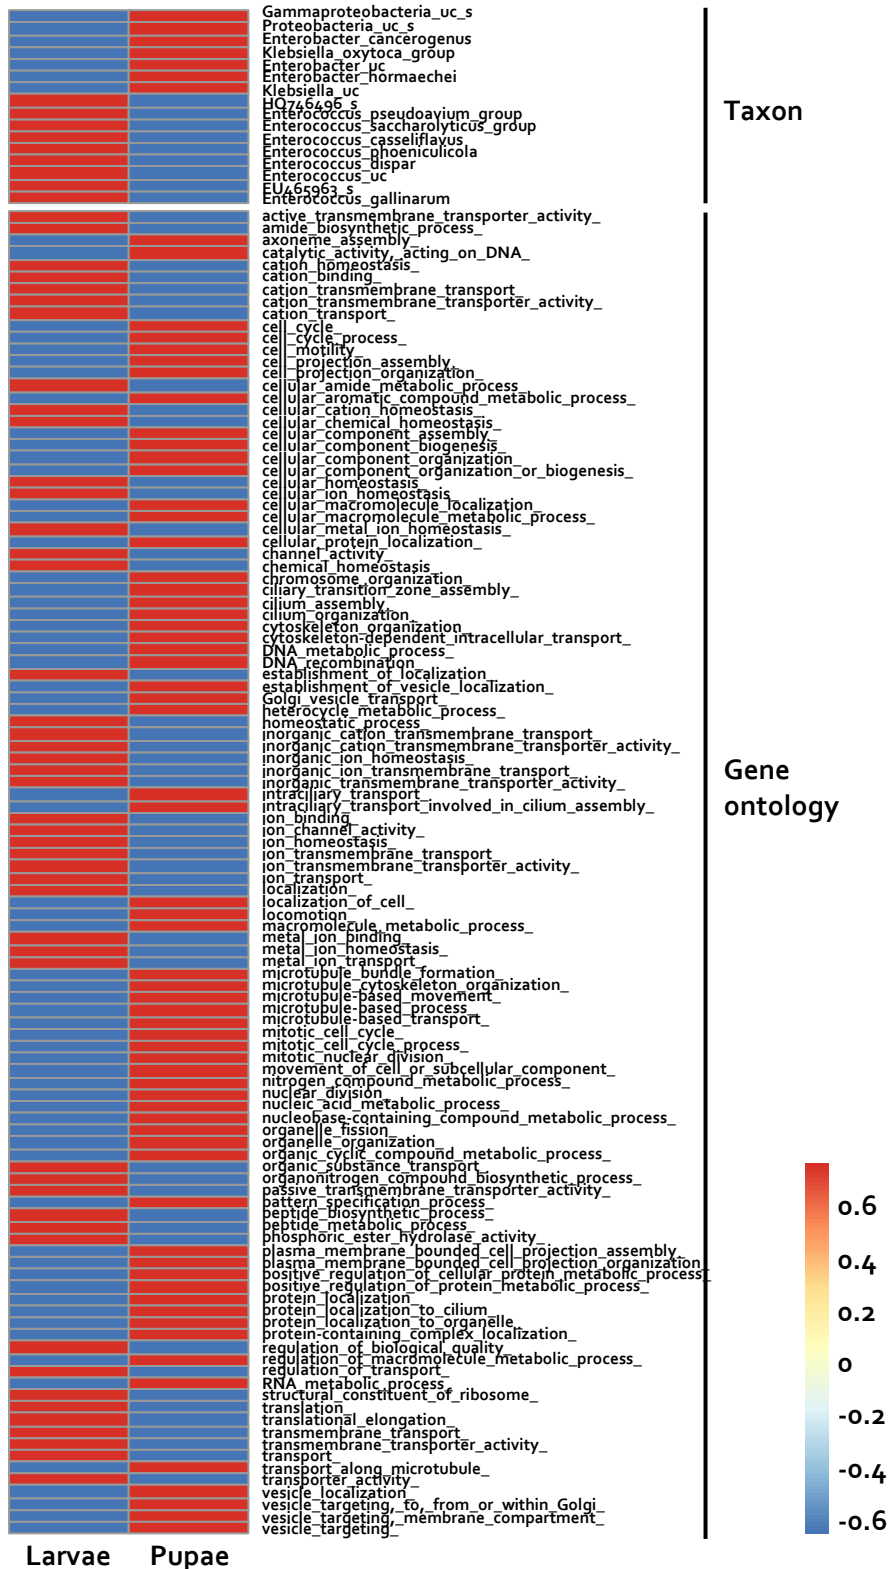

# Supplementary Figure 3

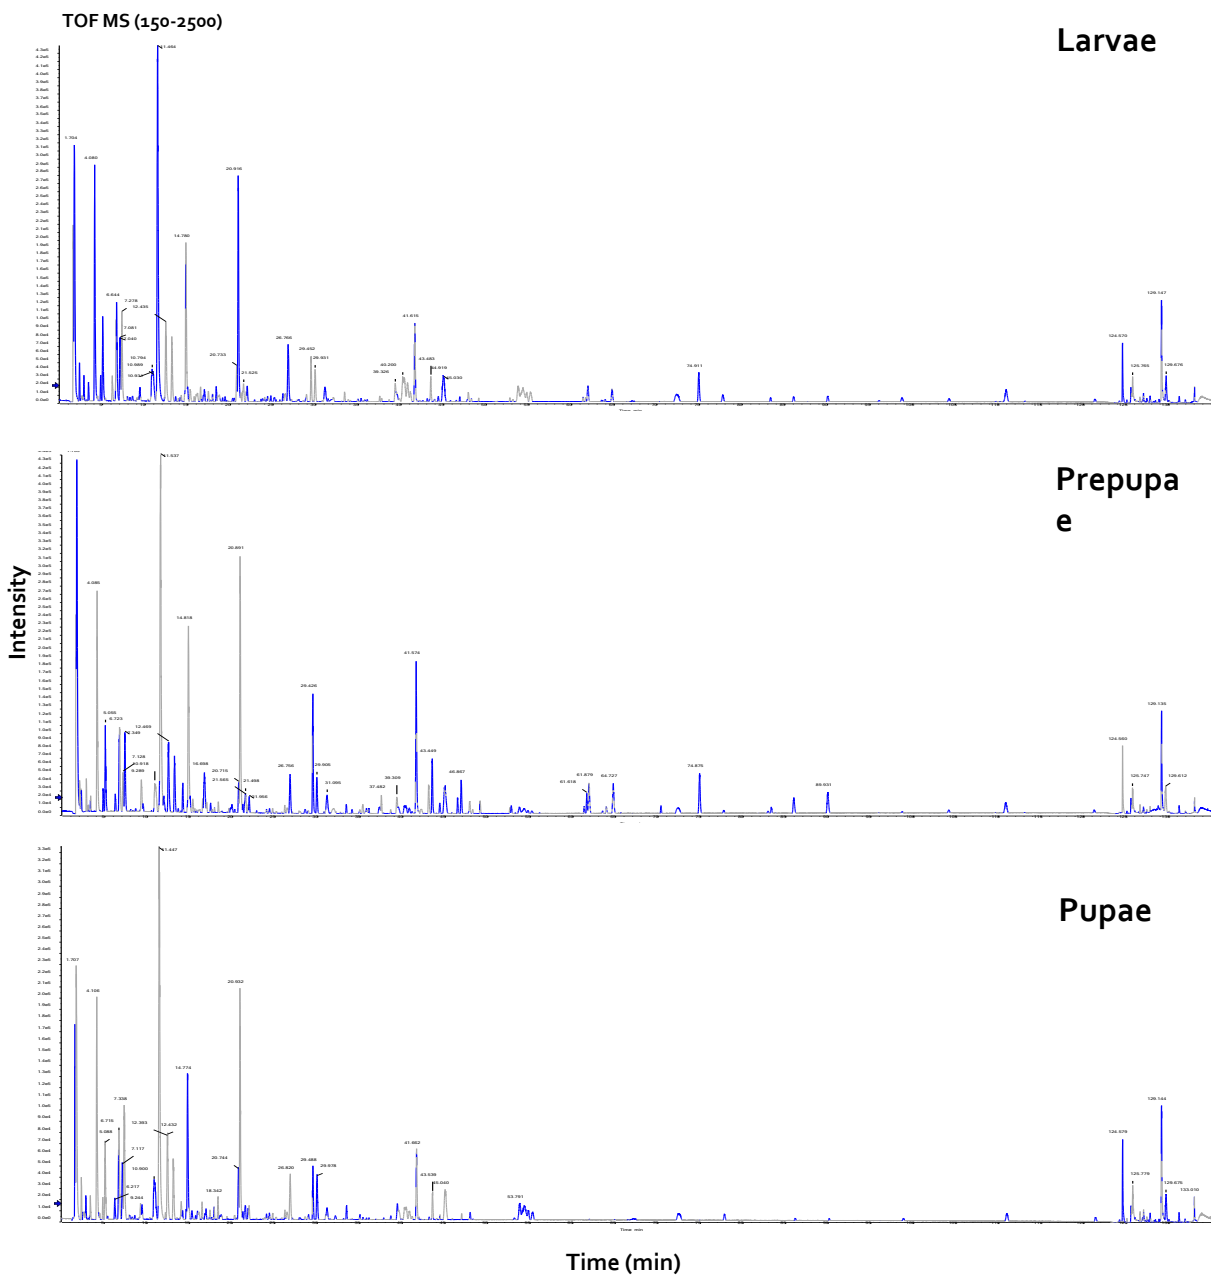

# Supplementary Figure 4

**A**

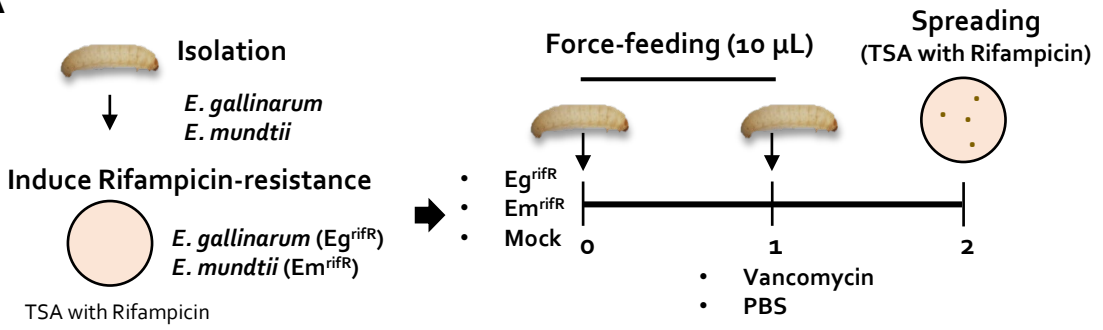

**B**

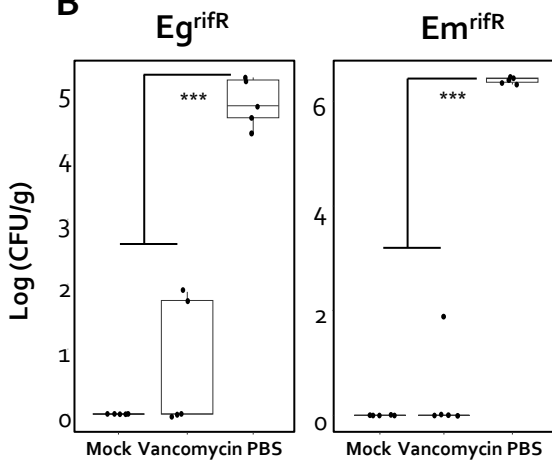

**C**

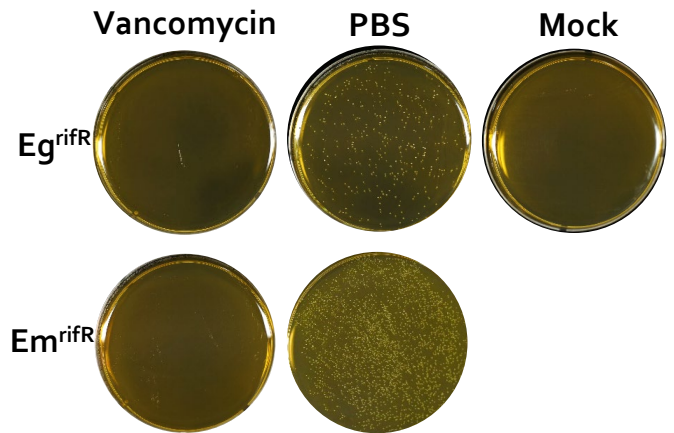

Supplement: spectrum.02780-22-s0001.pdf [file spectrum.02780-22-s0001.pdf]
